# Supplementary material for: Particle size effect on the superconducting properties of YBa2Cu3O7−x particles
Source: Royal Society of Chemistry journal article supplement (doi:10.1039/c7dt01974b), 2017-01-01
Supplement: c7dt01974b1.pdf [file c7dt01974b1.pdf]

# Particle size effect in the properties of $\text{YBa}_2\text{Cu}_3\text{O}_{7-x}$ particles

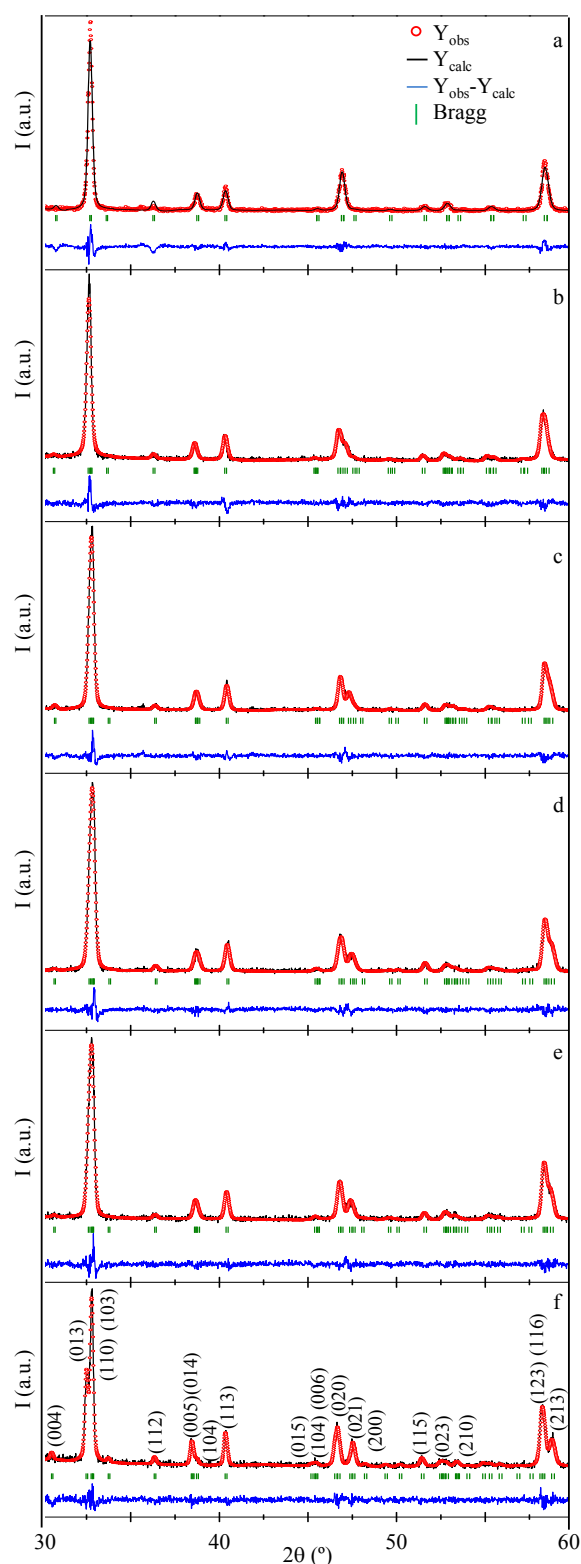

Figure S1. X-ray diffraction patterns of Y100 (a), Y150 (b) Y205 (c), Y250 (d), Y300 (e) and Y500 (f) samples. The calculated patterns obtained from profile refinement of the experimental one together with the difference between both, and the Bragg positions are also depicted.
